# Supplementary material for: Podophyllic Aldehyde, a Podophyllotoxin Derivate, Elicits Different Cell Cycle Profiles Depending on the Tumor Cell Line: A Systematic Proteomic Analysis
Source: MDPI journal article supplement (doi:10.3390/ijms25094631), 2024-04-24
Supplement: s1 [file s1]

# Suplemmentary File S3

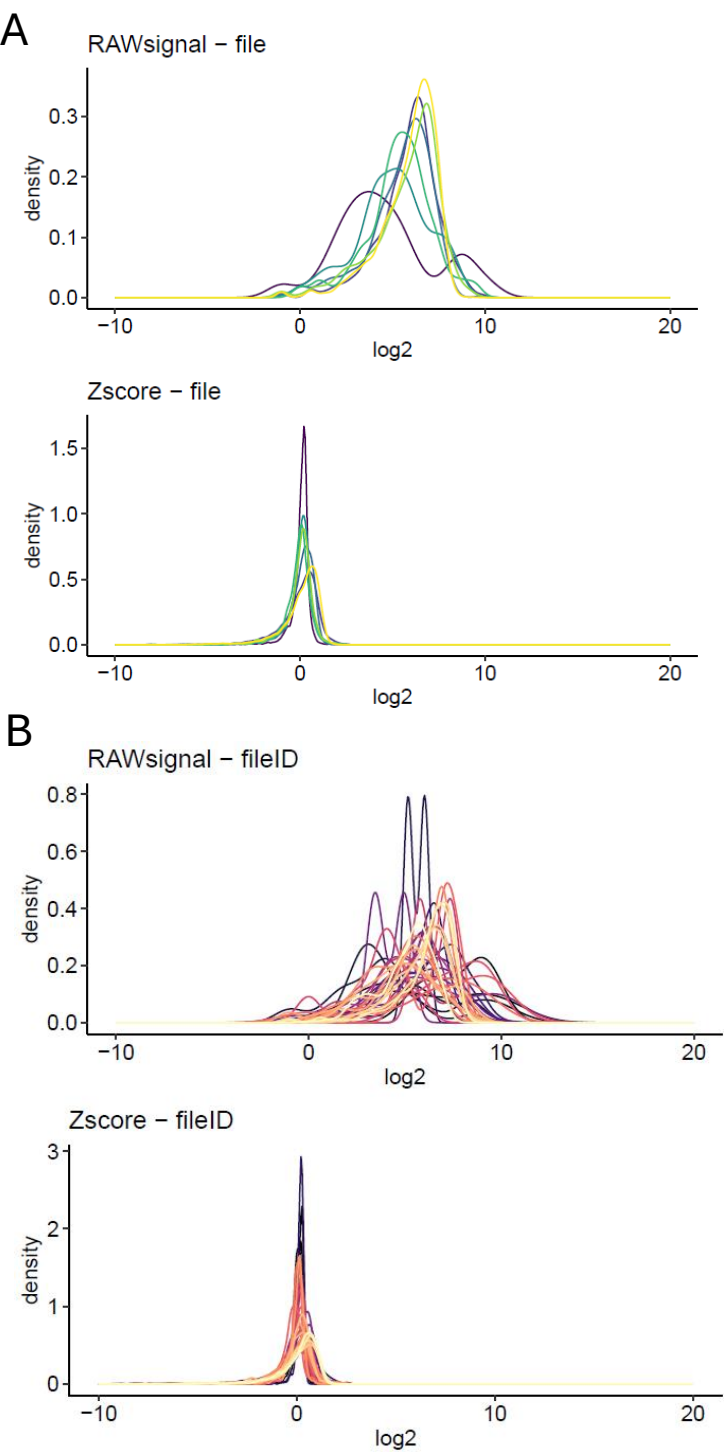

Density Plots for signal distribution of microarrays (A) and subarrays (B)

Supplementary File S3

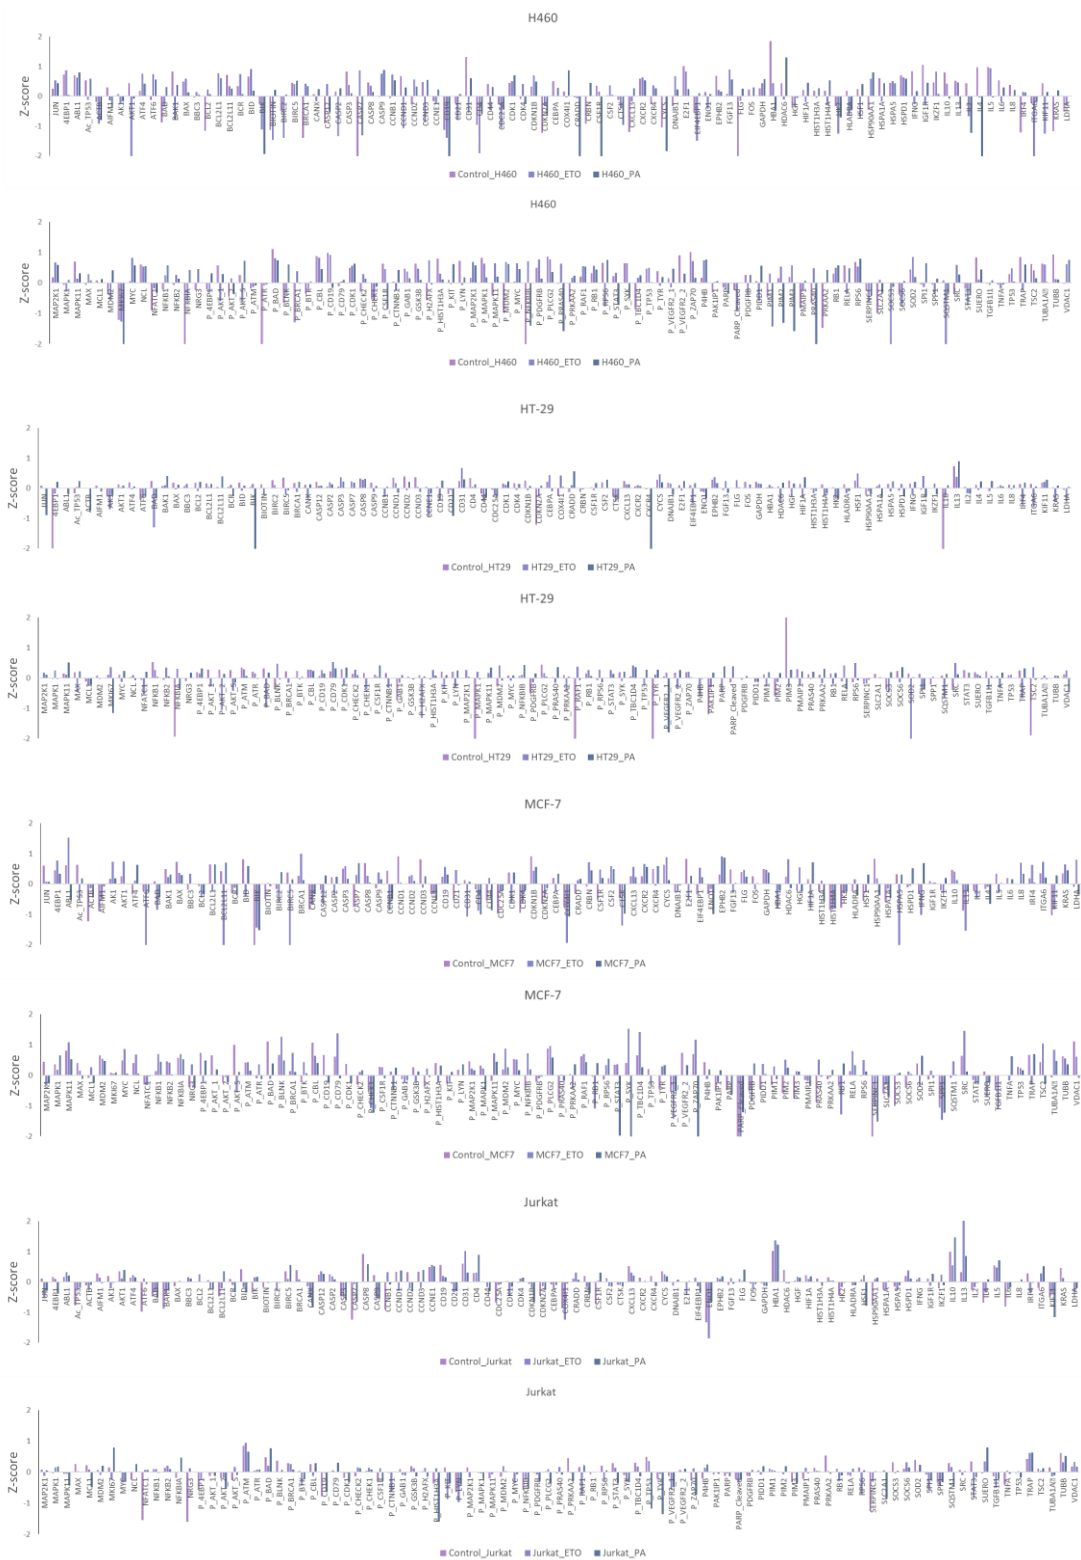

Relative abundance distribution (Zscore) for proteins in control conditions and drugs: etoposide (ETO) and podophyllinic aldehyde (PA) in the for tumoral cell lines tested in this work (H460, HT-29, MCF-7 and Jurkat)
