# Supplementary material for: Podophyllic Aldehyde, a Podophyllotoxin Derivate, Elicits Different Cell Cycle Profiles Depending on the Tumor Cell Line: A Systematic Proteomic Analysis
Source: Int J Mol Sci. 2024 Apr 24;25(9):4631. doi: 10.3390/ijms25094631 (PMC11083757; doi:10.3390/ijms25094631)
Supplement: Supplementary file 1 [file ijms-25-04631-s001.zip › Hernández2024_IJMS_FileS1.xlsx]

## Sheet: Hoja1
Cell line	Drug	Proteins
H460	ETO	Ac_TP53, ACTB, AIFM1, AKT1, BAK1, BCL2L11, BCR, BIK, CASP2, CASP3, CCND1, CCND3, CD21, CD31, CD4, CD44, CDC25A, CEBPA, COX4I1, ENO1, EPHB2, FOS, HBA1, HIST1H3A, HIST1H4A, HK2, HLADRA, HSPA1A, IFNG, IGF1R, IL10, IL4, MAPK11, P_AKT_1, P_AKT_S, P_HIST1H3A, P_LYN, P_MAPK1, P_MAPK11, P_RPS6, P_VEGFR2_2, P_ZAP70, PARP_Cleaved, PDGFRB, PIDD1, RELA, RPS6, SERPINC1, STAT3, TRAP, TUBB.
	PA	AIFM1, AKT1, BAK1, BCL2L11, BCR, CASP3, CCND1, CD31, CEBPA, EPHB2, FOS, HBA1, HLADRA, IFNG, IGF1R, IL10, IL4, MAPK11, P_AKT_1, P_HIST1H3A, P_MAPK1, P_MAPK11, P_VEGFR2_2, P_ZAP70, STAT3, TUBB, CASP8, P_BAD, P_PLCG2, MKI67, P_CSF1R, TUBA1A.
HT29	ETO	BID, CCNE1, BAD, BAX, CD44, IFNG, HK2, CD19, CANX, HSPA5, CXCL13, EIF4EBP1, CCND2, CASP2, HDAC6, MYC, BIRC5, BRCA1, IRF4, CASP8, CASP9, CDKN1B, BCL2, LDHA, HGF, CD4, IKZF1, NFATC1, IL2, KRAS, IL6, BCR, IKZF1, NFKB1, HIF1A, HLADRA, CCND1, CCND3, CDC25A, CDK4, MAD1L1, P_AKT_1, MAX, HIST1H4A, P_AKT_2, P_AKT_S, P_BAD, P_BRCA1, P_CDK1, P_CTNNB1, P_KIT, P_LYN, P_MAPK1, P_MAPK11, P_MYC, P_PLCG2, P_PRAS4…
	PA	CASP2, MAD1L1, BAD, BCR, P_AKT_S, ATF4, ENO1, NFKB1, CCND3, JUN, P_KIT, P_MAPK1, HK2, CCNE1, P_PLCG2, AIFM1, CASP9, CCND1, MKI67, CD44, CDKN1B, P_CTNNB1, BID, P_VEGFR2_1, SPI1, P_AKT_1, ABL1, BIK, CXCR4, P_CHEK1, HSPA1A, BIRC5, MCL1, CEBPA, TGFB1I1, IL5, HIST1H4A, IL2, P_BAD, P_BRCA1, FOS, P_ATR, P_ZAP70, ACTB, SOD2, CD21, PAK1IP1, RELA.
MCF-7	ETO	Ac_TP53, BAD, BAK1, BAX, BCL2L1, BCL2L11, BID, BIRC5, CASP12, CCND1, CCND3, CDK1, CDKN1B, COX4I1, CTSK, E2F1, FGF13, GAPDH, HIF1A, HSP90AA1, HSPA5, HSPD1, IFNG, IL13, MAD1L1, MAX, MDM2, P_AKT_1, P_AKT_S, P_BAD, P_CBL, P_CD19, P_CSF1R, P_CTNNB1, P_GAB1, P_MAPK1, P_PRKAA2, P_RB1, P_TP53, P_VEGFR2_1, P_VEGFR2_2, RB1, SPP1, TP53, TRAP, VIM.
	PA	Ac_TP53, CCNE1, BAK1, BAX, BCL2L1, P_BLNK, BID, CYCS, PMAIP1, CCND1, CCND3, CASP3, CDKN1B, COX4I1, CASP8, CCND2, FOS, ENO1, VDAC1, MAPK11, P_BTK, P_GSK3B, HGF, P_ZAP70, 4EBP1, MAX, MDM2, HDAC6, P_AKT_S, HSPA1A, P_CBL, P_CD19, P_CSF1R, MYC, CD19, ITGA6, KRAS, P_RB1, P_TP53, P_VEGFR2_1, P_VEGFR2_2, RB1, P_CDK1, P_4EBP1, IRF4, P_PLCG2, P_CD79, P_RAF1, SRC, P_SYK
Jurkat	ETO	4EBP1, ACTB, AIFM1, AK1, AKT1, ATF4, BCL2L1, BID, BIRC5, BRCA1, CASP8, CASP9, CCND1, CCND2, CCND3, CD19, CD21, CDK1, CRADD, CRBN, CXCL13, CXCR4, CYCS, E2F1, EIF4EBP1, EPHB2, HDAC6, HIST1H3A, HIST1H4A, HK2, HLADRA, IGF1R, IL10, IL2, IRF4, KRAS, LDHA, MAPK11, MAX, MKI67, MYC, P_ATM, P_ATR, P_BAD, P_BLNK, P_BRCA1, P_CBL, P_CHECK2, P_CHEK1, P_CTNNB1, P_KIT, P_LYN, P_MAP2K1, P_MYC, P_PDGFRB, P_PLCG2, …
	PA	4EBP1, ACTB, AIFM1, AK1, BAX, BID, BIRC5, BRCA1, CANX, CASP8, CASP9, CCND2, CD19, CD31, CD44, CRADD, CRBN, CXCL13, CXCR2, CXCR4, CYCS, EIF4EBP1, ENO1, HIST1H3A, HIST1H4A, HLADRA, IL10, IL2, IRF4, KRAS, LDHA, MAX, MKI67, MYC, P_ATM, P_ATR, P_BLNK, P_BRCA1, P_CDK1, P_CHECK2, P_CTNNB1, P_GAB1, P_GSK3B, P_HIST1H3A, P_KIT, P_PLCG2, P_PRAS40, P_PRKAA2, P_STAT3, P_SYK, P_TBC1D4, P_TP53, P_VEGFR2_2, P_ZA…
